# Supplementary material for: Occurrence, Sources, and Health Risks of Polycyclic Aromatic Hydrocarbons in Road Environments from Harbin, a Megacity of China
Source: MDPI journal article supplement (doi:10.3390/toxics11080695), 2023-08-11
Supplement: s1 [file s1]

Supplementary materials

# Occurrence, Sources, and Health Risks of Polycyclic Aromatic Hydrocarbons in Road Environments from Harbin, a Megacity of China

Jinnong Li, Ye Zhang, Jianxin Wang, Hang Xiao, Anatoly Nikolaev, Yi-Fan Li, Zi-Feng Zhang and Zhong-Hua Tang

**Table S1.** Basic information for 32 PAHs

| PAHs                          | Abbr | Molecular formula                | Molecular weight | Structure                                                                            | Log $K_{ow}^a$ | Water solubility (mg/L) |
|-------------------------------|------|----------------------------------|------------------|--------------------------------------------------------------------------------------|----------------|-------------------------|
| 1,2,3,4-Tetrahydronaphthalene | THN  | C <sub>10</sub> H <sub>12</sub>  | 132.202          | 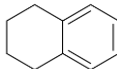   | 3.49           | 94.26                   |
| Indene                        | Ind  | C <sub>9</sub> H <sub>8</sub>    | 116.160          |    | 3.25           | 332.4                   |
| Naphthalene                   | NAP  | C <sub>10</sub> H <sub>8</sub>   | 128.171          |    | 3.17           | 142.1                   |
| Biphenyl                      | BP   | C <sub>12</sub> H <sub>10</sub>  | 154.208          |   | 3.76           | 29.01                   |
| Acenaphthylene                | Acy  | C <sub>12</sub> H <sub>8</sub>   | 152.192          |  | 3.94           | 2.487                   |
| Acenaphthene                  | Ace  | C <sub>12</sub> H <sub>10</sub>  | 154.208          |  | 3.92           | 2.534                   |
| Fluorene                      | Flo  | C <sub>13</sub> H <sub>10</sub>  | 166.219          |  | 4.02           | 1.339                   |
| Dibenzothiophene              | DBT  | C <sub>12</sub> H <sub>8</sub> S | 184.257          |  | 4.29           | 0.883                   |
| Phenanthrene                  | Phe  | C <sub>14</sub> H <sub>10</sub>  | 178.229          |  | 4.35           | 0.677                   |
| Anthracene                    | Ant  | C <sub>14</sub> H <sub>10</sub>  | 178.229          |  | 4.35           | 0.959                   |
| Carbazole                     | CARZ | C <sub>12</sub> H <sub>9</sub> N | 167.207          |  | 3.29           | 7.607                   |
| Fluoranthene                  | FLU  | C <sub>16</sub> H <sub>10</sub>  | 202.251          |  | 4.93           | 0.130                   |

|                         |          |                                 |         |                                                                                      |      |                |
|-------------------------|----------|---------------------------------|---------|--------------------------------------------------------------------------------------|------|----------------|
| Pyrene                  | PYR      | C <sub>16</sub> H <sub>10</sub> | 202.251 | 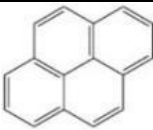   | 4.93 | 0.225          |
| Retene                  | RET      | C <sub>18</sub> H <sub>18</sub> | 234.335 |    | 6.35 | 0.009          |
| 2,3-Benzofluorene       | 2,3-BFLO | C <sub>17</sub> H <sub>12</sub> | 216.277 |    | 5.19 | 0.033          |
| Benzo[c]phenanthrene    | BCP      | C <sub>18</sub> H <sub>12</sub> | 228.288 |    | 5.52 | 0.026          |
| Benz[a]anthracene       | BaA      | C <sub>18</sub> H <sub>12</sub> | 228.288 |    | 5.52 | 0.029          |
| Chrysene                | CHR      | C <sub>18</sub> H <sub>12</sub> | 228.288 |    | 5.52 | 0.026          |
| Benzo[j]fluoranthene    | BjF      | C <sub>20</sub> H <sub>12</sub> | 252.309 |  | 5.78 | 0.021          |
| Benzo[b]fluoranthene    | BbF      | C <sub>20</sub> H <sub>12</sub> | 252.309 |  | 6.11 | 0.021          |
| Benzo[k]fluoranthene    | BkF      | C <sub>20</sub> H <sub>12</sub> | 252.309 |  | 6.11 | 0.011          |
| Benzo[e]pyrene          | BeP      | C <sub>20</sub> H <sub>12</sub> | 252.309 |  | 6.11 | 0.006          |
| Benzo[a]pyrene          | BaP      | C <sub>20</sub> H <sub>12</sub> | 252.309 |  | 5.99 | 0.174          |
| Perylene                | PER      | C <sub>20</sub> H <sub>12</sub> | 252.309 |  | 6.11 | 0.225          |
| 9,10-Diphenylanthracene | 9,10-DPA | C <sub>26</sub> H <sub>18</sub> | 330.421 |  | 7.87 | 3.756<br>e-005 |

|                        |       |                                 |         |                                                                                      |      |                |
|------------------------|-------|---------------------------------|---------|--------------------------------------------------------------------------------------|------|----------------|
| Indeno[1,2,3-cd]pyrene | ICDP  | C <sub>22</sub> H <sub>12</sub> | 276.331 | 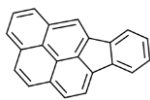   | 6.76 | 0.028          |
| Dibenz[a,h]anthracene  | DahA  | C <sub>22</sub> H <sub>14</sub> | 278.347 |    | 6.70 | 0.003          |
| Benzo[g,h,i]perylene   | BahiP | C <sub>22</sub> H <sub>12</sub> | 276.331 |    | 6.70 | 0.002          |
| Dibenzo[a,l]pyrene     | dBaIP | C <sub>24</sub> H <sub>14</sub> | 302.368 |    | 7.28 | 2.404<br>e-004 |
| Dibenzo[a,e]pyrene     | dBaeP | C <sub>24</sub> H <sub>14</sub> | 302.368 |    | 7.28 | 2.404<br>e-004 |
| Dibenzo[a,i]pyrene     | dBaiP | C <sub>24</sub> H <sub>14</sub> | 302.368 |  | 7.28 | 5.544<br>e-004 |
| Dibenzo[a,h]pyrene     | dBahP | C <sub>24</sub> H <sub>14</sub> | 302.368 |  | 7.28 | 5.544<br>e-004 |

Note: Kow = Octanol-water Partition coefficient; a: predicted using EPI suite V4.1

**Table S2.** Detailed information of sampling sites

| Samples sites                     |                       |                   | Road designations |                   |                  |                  |
|-----------------------------------|-----------------------|-------------------|-------------------|-------------------|------------------|------------------|
| Arterial road<br>(AR, n=6)        | Youyixi<br>road       | Zhongshan<br>road | Hexing<br>road    | Hongqi<br>street  | Xianfeng<br>road | Jichang<br>road  |
| Sub-arterial road<br>(SR, n=6)    | Xinyang<br>road       | Lijiang<br>road   | Haping<br>road    | Songhai<br>road   | Hadong<br>road   | Nanzhi<br>road   |
| Branch way<br>(BW, n=6)           | Guxin<br>road         | Herun<br>street   | Xusheng<br>street | Xuefudong<br>road | Xilong<br>street | Daokou<br>street |
| Highway<br>(HW, n=1)              | Airport<br>expressway |                   |                   |                   |                  |                  |
| Surface parking lot (n=5)         | Hongbo                | Maidelong         | Wangfujing        | Meikailong        | Zhongyangdajie   |                  |
| Underground parking lot<br>(n=10) | Leso                  | Guxiang           | Sifangtai         | Yuanda            | Baisheng         |                  |
|                                   | Maikaile              | Kaide             | Darunfa           | Yijiajiaju        | Jinjuewanxing    |                  |

**Table S3.** The optimized GC-MS/MS parameters for PAHs.

| PAHs                          | Retention time<br>(min) | Quantifier<br>Transition (m/z) | Collision<br>energy (eV) | Qualifier<br>Transition (m/z) | Collision<br>energy (eV) |
|-------------------------------|-------------------------|--------------------------------|--------------------------|-------------------------------|--------------------------|
| 1,2,3,4-Tetrahydronaphthalene | 3.529                   | 132→104                        | 15                       | 104→78                        | 10                       |
| Indene                        | 3.532                   | 115→89                         | 20                       | 115→65                        | 25                       |
| Naphthalene                   | 3.932                   | 128→102                        | 20                       | 128→127                       | 20                       |
| Biphenyl                      | 5.232                   | 154→153                        | 15                       | 154→152                       | 30                       |
| Acenaphthylene-D8             | 5.850                   | 160→158                        | 25                       | 160→132                       | 30                       |
| Acenaphthylene                | 5.890                   | 152→150                        | 25                       | 152→151                       | 25                       |
| Acenaphthene-D10              | 5.926                   | 162→160                        | 30                       | 162→158                       | 30                       |
| Acenaphthene                  | 5.996                   | 153→152                        | 25                       | 153→151                       | 25                       |
| Fluorene-D10                  | 6.580                   | 176→174                        | 20                       | 176→172                       | 40                       |
| Fluorene                      | 6.660                   | 166→165                        | 25                       | 165→163                       | 30                       |
| Dibenzothiophene              | 7.816                   | 184→152                        | 35                       | 184→139                       | 40                       |
| Phenanthrene-D10              | 7.904                   | 188→160                        | 30                       | 188→184                       | 40                       |
| Phenanthrene                  | 8.024                   | 178→176                        | 25                       | 178→152                       | 25                       |
| Anthracene                    | 8.091                   | 178→176                        | 25                       | 178→152                       | 25                       |
| Carbazole                     | 9.292                   | 167→166                        | 20                       | 167→139                       | 35                       |
| Fluoranthene-D10              | 9.402                   | 212→208                        | 40                       | 212→210                       | 30                       |
| Fluoranthene                  | 10.402                  | 202→200                        | 35                       | 202→201                       | 25                       |
| Pyrene-D10                    | 10.845                  | 212→208                        | 40                       | 212→210                       | 40                       |
| Pyrene                        | 10.925                  | 202→200                        | 35                       | 202→201                       | 25                       |
| Retene                        | 11.429                  | 219→204                        | 15                       | 234→219                       | 15                       |
| 2,3-Benzofluorene             | 12.077                  | 216→215                        | 25                       | 215→213                       | 40                       |
| Benzo(c)phenanthrene          | 14.390                  | 228→227                        | 20                       | 228→226                       | 45                       |
| Benz(a)anthracene-D12         | 15.011                  | 240→236                        | 40                       | 240→212                       | 40                       |
| Benz(a)anthracene             | 15.091                  | 228→226                        | 30                       | 228→202                       | 30                       |
| Chrysene-D12                  | 15.061                  | 240→236                        | 40                       | 240→212                       | 30                       |
| Chrysene                      | 15.161                  | 228→226                        | 30                       | 228→202                       | 30                       |
| Benzo[b]fluoranthene-D12      | 17.163                  | 264→260                        | 40                       | 264→236                       | 40                       |
| Benzo[k]fluoranthene-D12      | 17.218                  | 264→260                        | 40                       | 264→236                       | 40                       |
| Benzo(j)fluoranthene          | 17.241                  | 252→250                        | 40                       | 250→248                       | 45                       |
| Benzo[b]fluoranthene          | 17.243                  | 252→250                        | 30                       | 252→226                       | 25                       |
| Benzo[k]fluoranthene          | 17.288                  | 252→250                        | 30                       | 252→226                       | 25                       |
| Benzo(e)pyrene                | 17.829                  | 252→250                        | 45                       | 250→248                       | 45                       |
| Benzop[a]pyrene-D12           | 17.880                  | 264→260                        | 40                       | 264→236                       | 40                       |
| Benzo[a]pyrene                | 17.960                  | 252→250                        | 30                       | 252→226                       | 25                       |
| Perylene-D                    | 18.129                  | 264→260                        | 30                       | 264→262                       | 30                       |
| Perylene                      | 18.169                  | 252→250                        | 45                       | 250→248                       | 45                       |
| 9,10-Diphenylanthracene       | 18.359                  | 252→250                        | 40                       | 330→252                       | 35                       |
| Indeno[1,2,3-cd]pyrene-D12    | 21.280                  | 288→284                        | 40                       | 288→286                       | 40                       |

|                            |        |         |    |         |    |
|----------------------------|--------|---------|----|---------|----|
| Dibenzo[a,h]anthracene-D14 | 21.334 | 292→288 | 40 | 292→290 | 30 |
| Indeno[1,2,3-cd]pyrene     | 21.360 | 276→274 | 45 | 276→272 | 50 |
| Dibenz(a,h)anthracene      | 21.434 | 278→274 | 55 | 278→276 | 50 |
| Benzo[g,h,i]perylene-D12   | 22.164 | 288→284 | 40 | 288→286 | 30 |
| Benzo[g,h,i]perylene       | 22.254 | 276→274 | 45 | 276→272 | 50 |
| Dibenzo(a,l)pyrene         | 27.591 | 302→300 | 45 | 302→301 | 20 |
| Dibenzo(a,e)pyrene         | 31.066 | 302→300 | 45 | 300→298 | 40 |
| Dibenzo(a,i)pyrene         | 32.170 | 302→300 | 50 | 300→298 | 45 |
| Dibenzo(a,h)pyrene         | 32.749 | 302→300 | 40 | 300→298 | 40 |

**Table S4.** Limits of Detection (LOD) and Limits of Quantification (LOQ) of individual PAHs in dust and soil samples.

| PAHs                          | Dust       |            | soil       |            |
|-------------------------------|------------|------------|------------|------------|
|                               | LOD (ng/g) | LOQ (ng/g) | LOD (ng/g) | LOQ (ng/g) |
| 1,2,3,4-Tetrahydronaphthalene | 0.50       | 1.66       | 0.25       | 0.83       |
| Indene                        | 2.98       | 9.92       | 1.49       | 4.96       |
| Naphthalene                   | 0.01       | 0.04       | 0.01       | 0.02       |
| Biphenyl                      | 0.64       | 2.14       | 0.32       | 1.07       |
| Acenaphthylene                | 0.11       | 0.35       | 0.05       | 0.18       |
| Acenaphthene                  | 0.46       | 1.52       | 0.23       | 0.76       |
| Fluorene                      | 0.10       | 0.32       | 0.05       | 0.16       |
| Dibenzothiophene              | 0.01       | 0.04       | 0.01       | 0.02       |
| Phenanthrene                  | 0.03       | 0.10       | 0.01       | 0.05       |
| Anthracene                    | 0.03       | 0.10       | 0.02       | 0.05       |
| Carbazole                     | 0.04       | 0.14       | 0.02       | 0.07       |
| Fluoranthene                  | 0.01       | 0.03       | 0.01       | 0.02       |
| Pyrene                        | 0.01       | 0.03       | 0.004      | 0.01       |
| Retene                        | 0.03       | 0.10       | 0.01       | 0.05       |
| 2,3-Benzofluorene             | 0.78       | 2.59       | 0.39       | 1.30       |
| Benzo(c)phenanthrene          | 0.02       | 0.05       | 0.01       | 0.03       |
| Benz(a)anthracene             | 0.05       | 0.16       | 0.02       | 0.08       |
| Chrysene                      | 0.05       | 0.16       | 0.02       | 0.08       |
| Benzo(j)fluoranthene          | 0.048      | 0.16       | 0.02       | 0.08       |
| Benzo[b]fluoranthene          | 0.06       | 0.19       | 0.03       | 0.09       |
| Benzo[k]fluoranthene          | 0.05       | 0.18       | 0.03       | 0.09       |
| Benzo(e)pyrene                | 0.11       | 0.36       | 0.05       | 0.18       |
| Benzo[a]pyrene                | 0.79       | 2.64       | 0.40       | 1.32       |
| Perylene                      | 0.23       | 0.76       | 0.11       | 0.38       |
| 9,10-Diphenylanthracene       | 0.53       | 1.76       | 0.26       | 0.88       |
| Indeno[1,2,3-cd]pyrene        | 0.14       | 0.48       | 0.07       | 0.24       |
| Dibenz(a,h)anthracene         | 0.03       | 0.10       | 0.02       | 0.05       |
| Benzo[g,h,i]perylene          | 0.03       | 0.10       | 0.01       | 0.05       |

|                    |      |      |      |      |
|--------------------|------|------|------|------|
| Dibenzo(a,l)pyrene | 0.03 | 0.11 | 0.02 | 0.06 |
| Dibenzo(a,e)pyrene | 0.05 | 0.17 | 0.03 | 0.09 |
| Dibenzo(a,i)pyrene | 0.18 | 0.60 | 0.09 | 0.30 |
| Dibenzo(a,h)pyrene | 0.06 | 0.20 | 0.03 | 0.10 |

**Table S5.** The values of exposed parameters used for the incremental lifetime cancer risk assessment (ILCR) [1]

| Exposure parameter                               | Adult                | Child                | Unit                             |
|--------------------------------------------------|----------------------|----------------------|----------------------------------|
| Body weight (BW)                                 | 61.5                 | 15                   | kg                               |
| Exposure frequency (EF)                          | 180                  | 180                  | day year <sup>-1</sup>           |
| Exposure duration(ED)                            | 24                   | 6                    | year                             |
| Ingestion rate (IR <sub>ingestion</sub> )        | 100                  | 200                  | mg day <sup>-1</sup>             |
| Dermal exposure area (SA)                        | 5700                 | 2800                 | cm <sup>2</sup>                  |
| Dermal adherence factor (AF)                     | 0.07                 | 0.2                  | mg cm <sup>-2</sup>              |
| Dermal adsorption fraction (ABS)                 | 0.13                 | 0.13                 | unitless                         |
| Inhalation rate (IR <sub>inhalation</sub> )      | 20                   | 10                   | m <sup>3</sup> day <sup>-1</sup> |
| Average life span (AT)<br>(70years×365days/year) | 25550                | 25550                | day                              |
| Particle emission factor (PEF)                   | 1.36×10 <sup>9</sup> | 1.36×10 <sup>9</sup> | m <sup>3</sup> kg <sup>-1</sup>  |

Note: BW is body weight, AT is the average life span, EF is the exposure frequency, ED is the exposure duration, IR<sub>inhalation</sub> is the inhalation rate, IR<sub>ingestion</sub> is the dust intake rate, SA is the dermal surface exposure, AF is the dermal adherence factor, ABS is the dermal adsorption fraction, and PEF is the particle emission factor. CSF is defined as an upper-bound of the probability of a response per unit intake of a chemical over a lifetime.

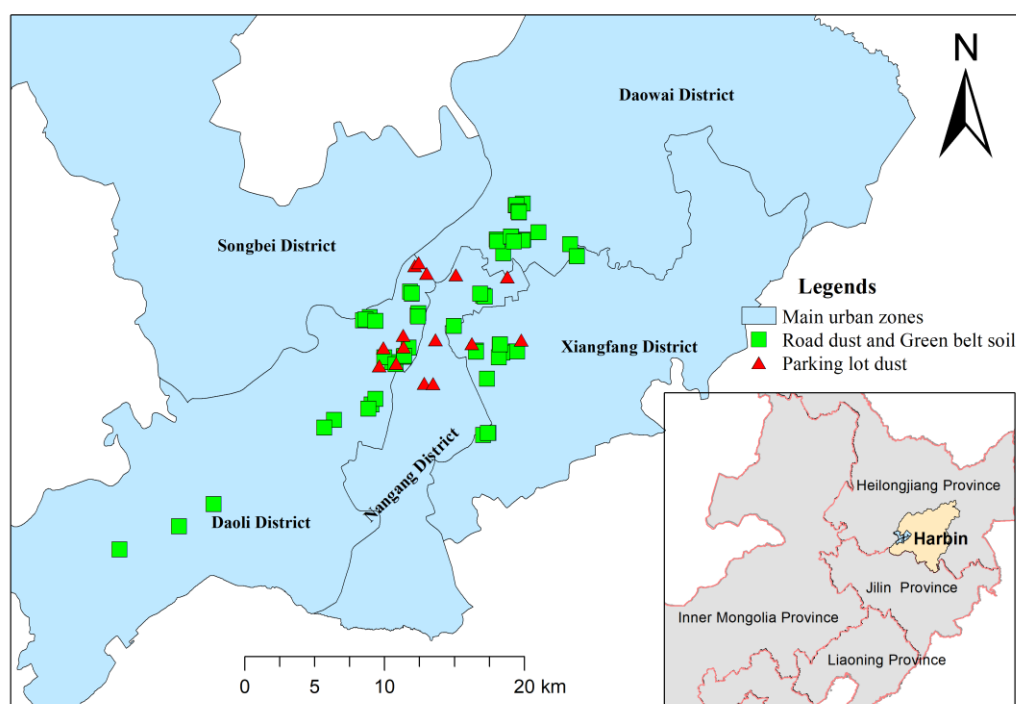

**Figure S1.** Sampling sites of road dust, green belt soil, and parking lot dust in Harbin, Northeast China

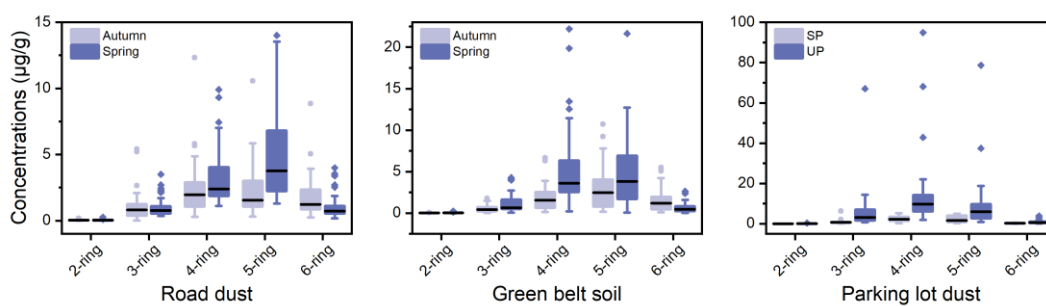

**Figure S2.** The concentrations of PAHs with a different number of aromatic rings in road dust, green belt soil, and parking lot dust.

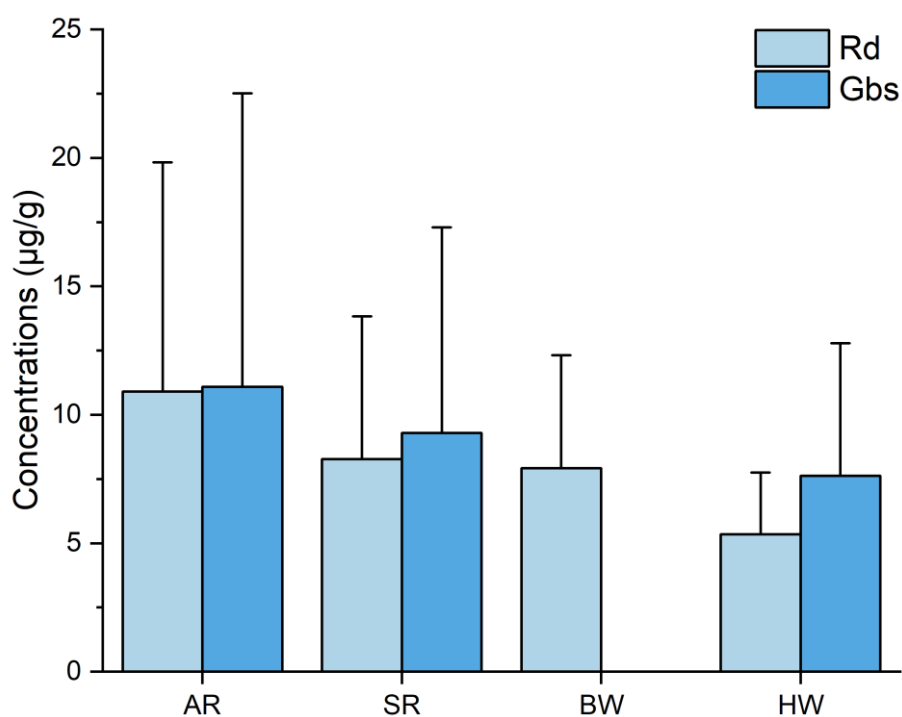

**Figure S3.** The concentrations of PAHs in AR, SR, BW, and HW during autumn and spring.

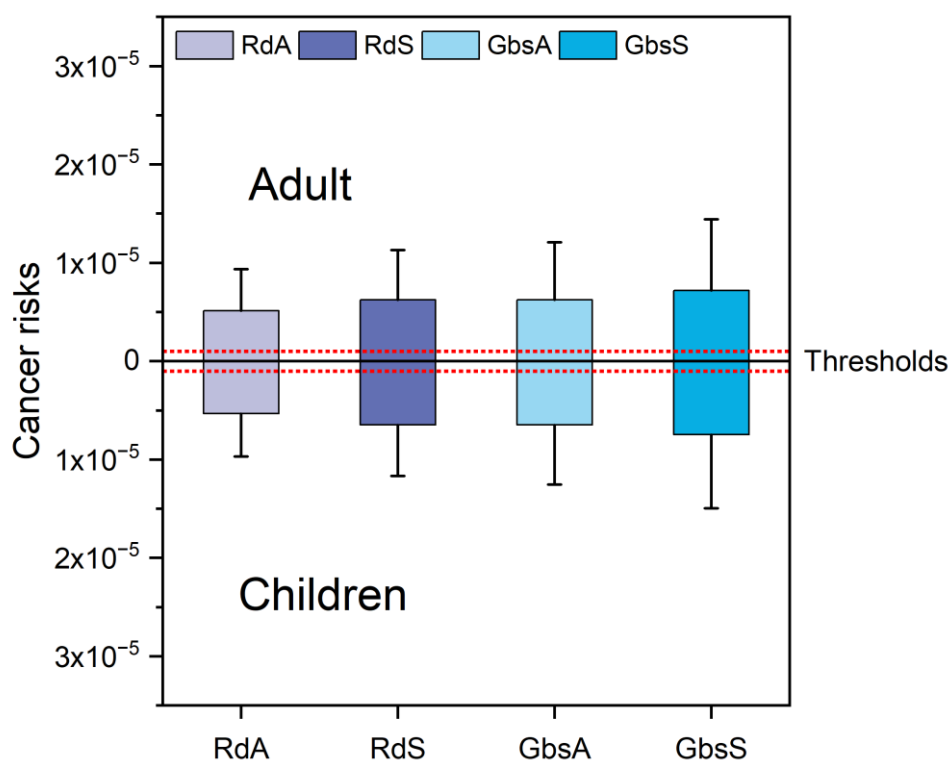

**Figure S4.** Seasonal variations of carcinogenic risk values.

RdA, road dust in autumn. RdS, road dust in spring. GbsA, green belt soil in autumn. GbsS, green belt soil in spring.

## References

1. Wu, Z.; He, C.; Lyu, H.; Ma, X.; Dou, X.; Man, Q.; Ren, G.; Liu, Y.; Zhang, Y. Polycyclic aromatic hydrocarbons and polybrominated diphenyl ethers in urban road dust from Tianjin, China: pollution characteristics, sources and health risk assessment. *Sustainable Cities and Society* 2022, 81, <https://doi.org/10.1016/j.scs.2022.103847>.
